# Supplementary material for: The potential application of black and blue phosphorene as cathode materials in rechargeable aluminum batteries: a first-principles study
Source: Royal Society of Chemistry journal article supplement (doi:10.1039/c9cp00453j), 2019-01-01
Supplement: c9cp00453j1.pdf [file c9cp00453j1.pdf]

**The Potential Application of Black and Blue Phosphorene as Cathode Materials  
in Rechargeable Aluminum Batteries: a First-principles study**

Xiang Xiao, Mingyong Wang,\* Jiguo Tu and Shuqiang Jiao\*

State Key Laboratory of Advanced Metallurgy, University of Science and Technology Beijing, 100083,

P R China. E-mails: mywang@ustb.edu.cn (M Wang), sjiao@ustb.edu.cn (S Jiao)

**Table S1** Calculated open circuit voltage (OCV) of black and blue phosphorene with different  $\text{AlCl}_4^-$  concentration  $(\text{AlCl}_4)_x\text{P}_n$ ;  $x = 1, 2, 4$ , and  $8$ ;  $n = 16$  or  $18$  for black or blue phosphorene, respectively).

| $x$                             | <b>1</b> | <b>2</b> | <b>4</b> | <b>8</b> |
|---------------------------------|----------|----------|----------|----------|
| <b><i>Black Phosphorene</i></b> | 2.44     | 2.59     | 2.59     | 4.1      |
| <b><i>Blue Phosphorene</i></b>  | 4.05     | 2.88     | 2.58     | 3.86     |

### Black Phosphorene

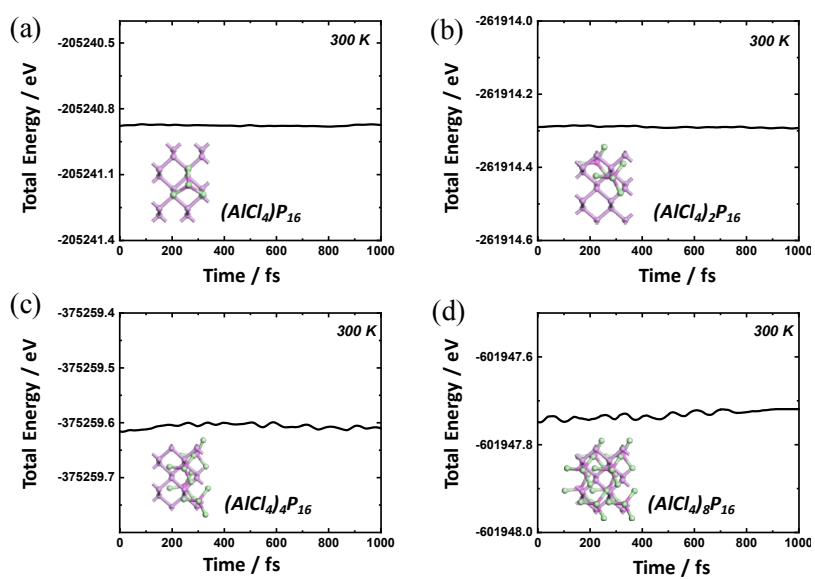

### Blue Phosphorene

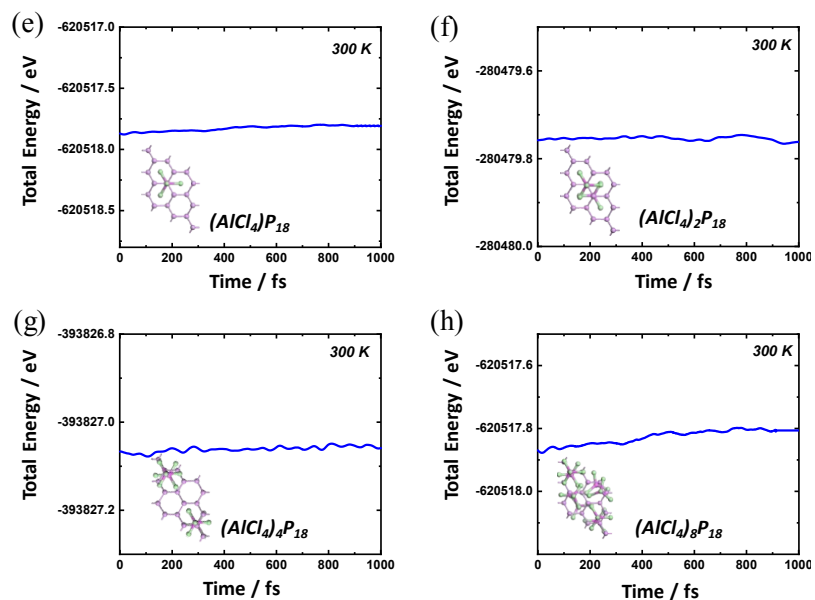

**Fig. S1** AIMD simulation analysis of black (a-d) and blue phosphorene (e-h) with multiple  $\text{AlCl}_4^-$  adsorptions.
